# Supplementary material
Source: PubMed Central journal article supplement (PMC4187690)
Supplement: JB.02009-14_zjb999093335so1.pdf [file JB.02009-14_zjb999093335so1.pdf]

**Supplementary Table 1 *Shigella* and *E. coli* strains used for the *oacD* gene PCR detection and antiserum 10 specificity evaluation**

| Strains  | Species               | Serotypes | <i>oacD</i> gene PCR results | Reactivity with antiserum 10 |
|----------|-----------------------|-----------|------------------------------|------------------------------|
| 51197    | <i>S. dysenteriae</i> | A1        | -                            | -                            |
| 51136    | <i>S. dysenteriae</i> | A2        | -                            | -                            |
| 51196    | <i>S. dysenteriae</i> | A3        | -                            | -                            |
| 51253    | <i>S. dysenteriae</i> | A4        | -                            | -                            |
| 51252    | <i>S. dysenteriae</i> | A5        | -                            | -                            |
| 51258    | <i>S. dysenteriae</i> | A6        | -                            | -                            |
| 51259    | <i>S. dysenteriae</i> | A7        | -                            | -                            |
| 51526    | <i>S. dysenteriae</i> | A8        | -                            | -                            |
| 51527    | <i>S. dysenteriae</i> | A9        | -                            | -                            |
| 51528    | <i>S. dysenteriae</i> | A10       | -                            | -                            |
| 51630    | <i>S. dysenteriae</i> | A11       | -                            | -                            |
| 51631    | <i>S. dysenteriae</i> | A12       | -                            | -                            |
| 51360    | <i>S. boydii</i>      | C1        | -                            | -                            |
| 51361    | <i>S. boydii</i>      | C2        | -                            | -                            |
| 51226    | <i>S. boydii</i>      | C3        | -                            | -                            |
| 3594-74  | <i>S. boydii</i>      | C4        | -                            | -                            |
| 51227    | <i>S. boydii</i>      | C5        | -                            | -                            |
| 51228    | <i>S. boydii</i>      | C6        | -                            | -                            |
| 51586    | <i>S. boydii</i>      | C7        | -                            | -                            |
| 51587    | <i>S. boydii</i>      | C8        | -                            | -                            |
| 51588    | <i>S. boydii</i>      | C9        | -                            | -                            |
| 51469    | <i>S. boydii</i>      | C10       | -                            | -                            |
| 51589    | <i>S. boydii</i>      | C11       | -                            | -                            |
| 51590    | <i>S. boydii</i>      | C12       | -                            | -                            |
| 51531    | <i>S. boydii</i>      | C13       | -                            | -                            |
| 51532    | <i>S. boydii</i>      | C14       | -                            | -                            |
| 51591    | <i>S. boydii</i>      | C15       | -                            | -                            |
| 51632    | <i>S. boydii</i>      | C16       | -                            | -                            |
| 51633    | <i>S. boydii</i>      | C17       | -                            | -                            |
| 51634    | <i>S. boydii</i>      | C18       | -                            | -                            |
| 51081    | <i>S. sonnei</i>      | I         | -                            | -                            |
| 03HL14   | <i>S. sonnei</i>      | I         | -                            | -                            |
| M6381    | <i>S. sonnei</i>      | II        | -                            | +                            |
| 2005163  | <i>S. sonnei</i>      | II        | -                            | +                            |
| 2009GZ46 | <i>S. sonnei</i>      | II        | -                            | +                            |
| 2009GZ47 | <i>S. sonnei</i>      | II        | -                            | +                            |
| 2008GZ04 | <i>S. sonnei</i>      | II        | -                            | +                            |
| 2009GZ16 | <i>S. sonnei</i>      | II        | -                            | +                            |
| 2009GZ20 | <i>S. sonnei</i>      | II        | -                            | +                            |
| 2009GZ26 | <i>S. sonnei</i>      | II        | -                            | +                            |
| 2009GZ31 | <i>S. sonnei</i>      | II        | -                            | +                            |
| 2010GZ24 | <i>S. sonnei</i>      | II        | -                            | +                            |

|           |                                     |         |   |   |
|-----------|-------------------------------------|---------|---|---|
| 2010GZ26  | <i>S. sonnei</i>                    | II      | - | + |
| 2010GZ27  | <i>S. sonnei</i>                    | II      | - | + |
| ET57      | <i>E. coli</i>                      | O6      | - | - |
| ET06      | <i>E. coli</i>                      | O8      | - | - |
| G1237     | <i>E. coli</i>                      | O13     | + | + |
| 042       | Enteraggregative <i>E. coli</i>     | O44:H18 | - | + |
| ET03      | <i>E. coli</i>                      | O71     | - | - |
| MH1278-15 | <i>E. coli</i>                      | O78     | - | - |
| EP001     | <i>E. coli</i>                      | O127    | - | - |
| ET47      | <i>E. coli</i>                      | O128    | - | - |
| EDL933    | Enterohemorrhagic<br><i>E. coli</i> | O157:H7 | - | - |
| ET100     | <i>E. coli</i>                      | O159    | - | - |

---
