# Supplementary material
Source: PubMed Central journal article supplement (PMC4187690)
Supplement: JB.02009-14_zjb999093335so2.pdf [file JB.02009-14_zjb999093335so2.pdf]

**Supplementary Table 2  $^1\text{H}$  and  $^{13}\text{C}$  NMR chemical shifts of O-acetylated and non-O-acetylated monosaccharide residues in *S. flexneri* O-polysaccharides**

| Sugar unit               | Monosaccharide |      |      |      |            |                   | O-Acetyl group |      |
|--------------------------|----------------|------|------|------|------------|-------------------|----------------|------|
|                          | H-3            | C-3  | H-4  | C-4  | H-6a, 6b   | C-6               | H-2            | C-2  |
| Sf301 <i>oacD</i>        |                |      |      |      |            |                   |                |      |
| Rhap <sup>III</sup> 3Ac  | 5.08           | 73.8 |      |      |            |                   | 2.21           | 21.8 |
| Rhap <sup>III</sup> 4Ac  |                |      | 4.80 | 75.4 |            |                   | 2.16           | 21.7 |
| Glc <sub>p</sub> NAc     |                |      |      |      | 3.77, 3.91 | 61.9              |                |      |
| Sf301 <i>oacD</i> _pSQZ6 |                |      |      |      |            |                   |                |      |
| Rhap <sup>III</sup> 3Ac  | 5.08           | 73.9 |      |      |            |                   | 2.21           | 21.8 |
| Rhap <sup>III</sup> 4Ac  |                |      | 4.79 | 75.4 |            |                   | 2.16           | 21.7 |
| Glc <sub>p</sub> NAc6Ac  |                |      |      |      | 4.32, 4.41 | 64.5              | 2.14           | 21.5 |
| 51571 (1a)               |                |      |      |      |            |                   |                |      |
| Rhap <sup>III</sup> 3Ac  | 5.08           | 74.2 |      |      |            |                   | 2.21           | 21.9 |
| Rhap <sup>III</sup> 4Ac  |                |      | 4.82 | 75.6 |            |                   | 2.17           | 21.8 |
| Glc <sub>p</sub> NAc     |                |      |      |      | 3.84, 3.84 | 62.6              |                |      |
| 51571_pSQZ6              |                |      |      |      |            |                   |                |      |
| Rhap <sup>III</sup> 3Ac  | 5.07           | 73.6 |      |      |            |                   | 2.20           | 21.8 |
| Rhap <sup>III</sup> 4Ac  |                |      | 4.80 | 75.3 |            |                   | 2.15           | 21.7 |
| Glc <sub>p</sub> NAc6Ac  |                |      |      |      | 4.32, 4.42 | 64.1              | 2.14           | 21.6 |
| 51577 (4b)               |                |      |      |      |            |                   |                |      |
| Rhap <sup>III</sup>      | 3.86           | 71.2 | 3.30 | 73.5 |            |                   |                |      |
| Glc <sub>p</sub> NAc     |                |      |      |      | 3.78, 3.98 | 67.0 <sup>a</sup> |                |      |
| 51577_pSQZ6              |                |      |      |      |            |                   |                |      |
| Rhap <sup>III</sup>      | 3.86           | 70.9 | 3.30 | 73.5 |            |                   |                |      |
| Glc <sub>p</sub> NAc6Ac  |                |      |      |      | 4.30, 4.41 | 64.3              | 21.4           | 21.5 |

<sup>a</sup>The signal is shifted downfield owing to glucosylation at position 6.
