# Supplementary material
Source: PubMed Central journal article supplement (PMC4187690)
Supplement: JB.02009-14_zjb999093335so3.pdf [file JB.02009-14_zjb999093335so3.pdf]

**Supplementary Table 3 Oac, OacB and OacC homologs identified in Sequenced *S. flexneri* strain Sf301**

| Oac protein | Gene name | Homologous   |                |                       | Encoding proteins or function                                                 |
|-------------|-----------|--------------|----------------|-----------------------|-------------------------------------------------------------------------------|
|             |           | Identity (%) | Similarity (%) | Alignment length (bp) |                                                                               |
| Oac         | SF0315    | 25.54        | 40.22          | 184                   | OacB, O-acyltransferase mediates the 3/4-O-acetylation on RhaIII              |
|             | SF1489    | 24.14        | 37.93          | 145                   | CelB, N,N'-diacetylchitobiose-specific PTS system transporter subunit IIC     |
|             | SF1720    | 22.22        | 40.74          | 135                   | Putative transport system permease protein                                    |
|             | SF1014    | 21.31        | 36.07          | 122                   | putative synthetase                                                           |
|             | SF1644    | 21.05        | 41.23          | 114                   | 7-alpha-hydroxysteroid dehydrogenase                                          |
|             | SF1193    | 20.75        | 41.51          | 106                   | Putative iron compound ABC transporter permease protein                       |
|             | SF0748    | 25.74        | 40.59          | 101                   | ATP-dependent DNA helicase DinG                                               |
|             | SF1119    | 30.61        | 43.88          | 98                    | YcfT, hypothetical protein                                                    |
|             | SF0972    | 26.8         | 42.27          | 97                    | YccA, hypothetical protein                                                    |
|             | SF1561    | 30.21        | 47.92          | 96                    | YdeD, O-acetylserine/cysteine export protein                                  |
|             | SF0742    | 25.56        | 41.11          | 90                    | YbhR, hypothetical protein                                                    |
| OacB        | SF1566    | 26           | 42             | 150                   | YdeA, sugar efflux transporter                                                |
|             | SF0628    | 22.95        | 41.8           | 122                   | GltK, glutamate/aspartate transport system permease                           |
|             | SF1498    | 22.64        | 45.28          | 106                   | YdjO, hypothetical protein                                                    |
|             | SF1009    | 23.53        | 39.22          | 102                   | YcdG, putative transport protein                                              |
|             | SF0002    | 21.43        | 43.88          | 98                    | ThrA, bifunctional aspartokinase I/homeserine dehydrogenase                   |
|             | SF1318    | 25.77        | 44.33          | 97                    | YcjP, putative transport system permease protein                              |
|             | SF1043    | 22.34        | 42.55          | 94                    | MdoC, glucans biosynthesis protein                                            |
|             | SF1011    | 26.09        | 41.3           | 92                    | Hypothetical protein                                                          |
|             | SF0656    | 25.27        | 45.05          | 91                    | CcrB, camphor resistance protein                                              |
| OacC        | SF0315    | 72.18        | 85.56          | 381                   | OacB, O-acyltransferase mediates the 3/4-O-acetylation on RhaIII of O-antigen |
|             | SF1569    | 22.08        | 38.96          | 154                   | YneH, glutaminase                                                             |
|             | SF1175    | 22.02        | 42.2           | 109                   | NhaB, sodium/proton antiporter                                                |
|             | SF0309    | 27.08        | 45.83          | 96                    | Hypothetical protein                                                          |
|             | SF0810    | 27.08        | 42.71          | 96                    | PotH, putrescine transporter subunit: membrane component of ABC superfamily   |
|             | SF1043    | 21.11        | 43.33          | 90                    | MdoC, glucans biosynthesis protein                                            |
